# Supplementary material for: Teaching Cell and Molecular Biology for Gender Equity
Source: Atypon-hosted journal article supplement (doi:10.1187/cbe.05-08-0096), 2006-09-01
Supplement: appendix1.pdf [file appendix1.pdf]

**Appendix 1. Class schedule for Fall 2003 more traditional section of BIOL 2104. JS was the instructor. The text was Hausman and Cooper's The Cell: A Molecular Approach, 3<sup>rd</sup> ed.**

BIOL 2104 CRN 90731

| Class | Date               | Topic                                                                            | Relevant text                |
|-------|--------------------|----------------------------------------------------------------------------------|------------------------------|
| 1     | Mon, Aug 25        | Evolution of the Cell and the Cell Biologist                                     | pp. 3-15                     |
| 2     | Wed, Aug 27        | How do we study Cell Biology?-microscopy and biochemistry                        | pp. 20-31                    |
| 3     | Fri, Aug 29        | How do we study Cell Biology?-model organisms/group exercise= quiz 1             | pp. 15-20                    |
| 4     | Mon, Sep 1         | The building blocks of life                                                      | pp. 41-56                    |
| 5     | Wed, Sep 3         | Enzymes: the instruments of change                                               | pp. 56-63                    |
| 6     | Fri, Sep 5         | The early molecular biologists/quiz 2                                            | pp. 89-103                   |
| 7     | Mon, Sep 8         | Modern molecular biology techniques I - recombinant DNA and cloning              | pp. 104-111                  |
| 8     | Wed, Sep 10        | Modern molecular biology techniques II - DNA sequencing and PCR                  | pp. 112-116                  |
| 9     | Fri, Sep 12        | Modern molecular biology techniques III - transgenics, "knockouts" and RNAi      | pp. 125-132                  |
| 10    | Mon, Sep 15        | Cellular Genomes: How are they organized?/quiz 3                                 | pp. 139-158                  |
| 11    | Wed, Sep 17        | The Human Genome Project                                                         | pp. 158-173                  |
| 12    | Fri, Sep 19        | Exam I                                                                           |                              |
| 13    | Mon, Sep 22        | DNA replication                                                                  | pp. 179-192                  |
| 14    | Wed, Sep 24        | DNA repair                                                                       | pp. 192-203                  |
| 15    | Fri, Sep 26        | RNA transcription - quiz 4                                                       | pp. 231-261                  |
| 16    | <b>Mon, Sep 29</b> | NO CLASS                                                                         |                              |
| 17    | <b>Wed, Oct 1</b>  | How do we study RNA? classic techniques and microarrays - Dr. Lederman           |                              |
| 18    | <b>Fri, Oct 3</b>  | RNA processing = quiz 5 - Dr. Huckle                                             | pp. 261-276                  |
| 19    | Mon, Oct 6         | Protein translation I                                                            | pp. 281-298                  |
| 20    | Wed, Oct 8         | Protein translation II                                                           | "                            |
| 21    | Fri, Oct 10        | Protein processing, modification and turnover / quiz 6                           | pp. 298-316                  |
| 22    | Mon, Oct 13        | Exam II                                                                          |                              |
| 23    | Wed, Oct 15        | Nuclear architecture and transport                                               | pp. 323-353                  |
| 24    | Fri, Oct 17        | ER and Golgi                                                                     | pp. 356-382                  |
| 25    | Mon, Oct 20        | Vesicle Transport, Lysosomes/quiz 7                                              | pp. 389-394                  |
| 26    | Wed, Oct 22        | Mitochondria I- architecture and genetics                                        | pp. 399-408                  |
| 27    | Fri, Oct 24        | Mitochondria II - oxidative phosphorylation                                      | pp. 408-415                  |
| 28    | Mon, Oct 27        | Chloroplasts and photosynthesis/quiz 8                                           | "                            |
| 29    | <b>Wed, Oct 29</b> | Cytoskeleton I - microtubules - Dr. Walker                                       | pp. 462-478                  |
| 30    | <b>Fri, Oct 31</b> | NO CLASS                                                                         |                              |
| 31    | Mon, Nov 3         | Cytoskeleton II - actin and intermediate filaments                               | pp. 436-461                  |
| 32    | Wed, Nov 5         | Membrane Transport I/quiz 9                                                      | pp. 483-510                  |
| 33    | Fri, Nov 7         | Membrane Transport II                                                            | "                            |
| 34    | Mon, Nov 10        | Exam III                                                                         |                              |
| 35    | Wed, Nov 12        | The Hallmarks of Cancer                                                          | Hanahan & Weinberg           |
| 36    | Fri, Nov 14        | Hallmark 1 Self-sufficiency in Growth - Cell Signaling                           | pp. 567-571,605-608, 653-655 |
| 37    | Mon, Nov 17        | Hallmark 1 Self-sufficiency in Growth - Cell Cycle                               | pp. 592-596                  |
| 38    | Wed, Nov 19        | Hallmark 2 Avoiding Antigrowth Signals/quiz 10                                   |                              |
| 39    | Fri, Nov 21        | Hallmark 3 - Promoting Angiogenesis<br>THANKSGIVING BREAK                        | "                            |
| 40    | Mon, Dec 1         | Hallmark 4 - Tissue invasion and metastasis                                      | pp. 522-528                  |
| 41    | Wed, Dec 3         | Hallmark 5 - Limitless replicative potential (telomerase and stem cells)/quiz 11 | pp. 621-622                  |
| 42    | Fri, Dec 5         | Hallmark 6 - Evading apoptosis                                                   | pp. 579-584, 656             |
| 43    | Mon, Dec 8         | Hallmark 7 - Genomic instability                                                 | pp. 596-598                  |
| 44    | Wed, Dec 10        | Wrapping Up - Emerging cancer therapies/quiz 12                                  | pp. 664-669                  |
| 45    | Wed, Dec 17        | FINAL EXAM 7:45 - 9:45 AM                                                        |                              |
