# Supplementary material for: Teaching Cell and Molecular Biology for Gender Equity
Source: Atypon-hosted journal article supplement (doi:10.1187/cbe.05-08-0096), 2006-09-01
Supplement: appendix2.pdf [file appendix2.pdf]

## **Appendix 2. Reading list for the Spring 2003 experimental section of BIOL 2104.**

### *Scientific Epistemology:*

Shapin, S. (1996). *The scientific revolution*. Chicago: University of Chicago Press. p. 13

### *DNA Structure:*

Watson, J. and F.H.C. Crick. 1953. A Structure for Deoxyribonucleic Acid. *Nature* 171: 737-738.

Wilkins, M.H.F., Stokes, A.R. and H.R. Wilson. 1953. Molecular Structure of Deoxyribose Nucleic Acid. *Nature* 171: 738-740.

Franklin, R.E. and Gosling R.G. 1953. Molecular Configuration in Sodium Thymonucleate. *Nature* 171:740-741.

Watson, J.D. and Crick, F.H.C. 1953. Genetical Implications of the Structure of Deoxyribonucleic Acids. *Nature* 171: 964-966.

### *The Central Dogma:*

Judson, H.F. 1979; *The Eighth Day of Creation*. New York: Simon and Schuster. pp. 290-291.

Olby, R. 1994. *The Path to the Double Helix: The Discovery of DNA*. New York: Dover. Pp.432-434.

### *mRNA:*

Judson, H.F. 1979; *The Eighth Day of Creation*. New York: Simon and Schuster. pp. 433-446.

### *Coding:*

Kay, L. 2000. *Who Wrote the Book of Life?* Stanford CA: Stanford University Press. pp. 136-137, 250-256.

### *Recombinant DNA:*

Berg, P. Baltimore, D., Brenner, S. Roblin, R.O. III, and Singer, M. 1975. Asilomar conference on Recombinant DNA Molecules. *Science* 188:991-994.

### *Cancer:*

Proctor, R.N. 1995. *Cancer Wars*. New York: Basic Books, pp.270-271.

Hubbard, R. and E. Wald. 1999. *Exploding the Gene Myth*. Boston: Beacon Press. pp. 91-92.

Marshall. E. 1993. "The Politics of Breast Cancer." *Science* 259:616-617.
